# Supplementary material for: Diagnostic value of transpulmonary thermodilution measurements for acute respiratory distress syndrome in a pig model of septic shock
Source: Springer Nature journal article supplement (doi:10.1186/s12967-022-03793-x), 2022-12-23
Supplement: MOESM1 [file 23855400]

**Diagnostic value of transpulmonary thermodilution measurements for acute respiratory distress syndrome in a pig model**

Yusuke Endo, Taku Miyasho, Kanako Endo, Yoshio Kawamura, Kenjiro Miyoshi, Ryosuke Takegawa, Takashi Tagami, Lance B. Becker, Kei Hayashida

**Supplementary materials**

## Supplemental figure legends

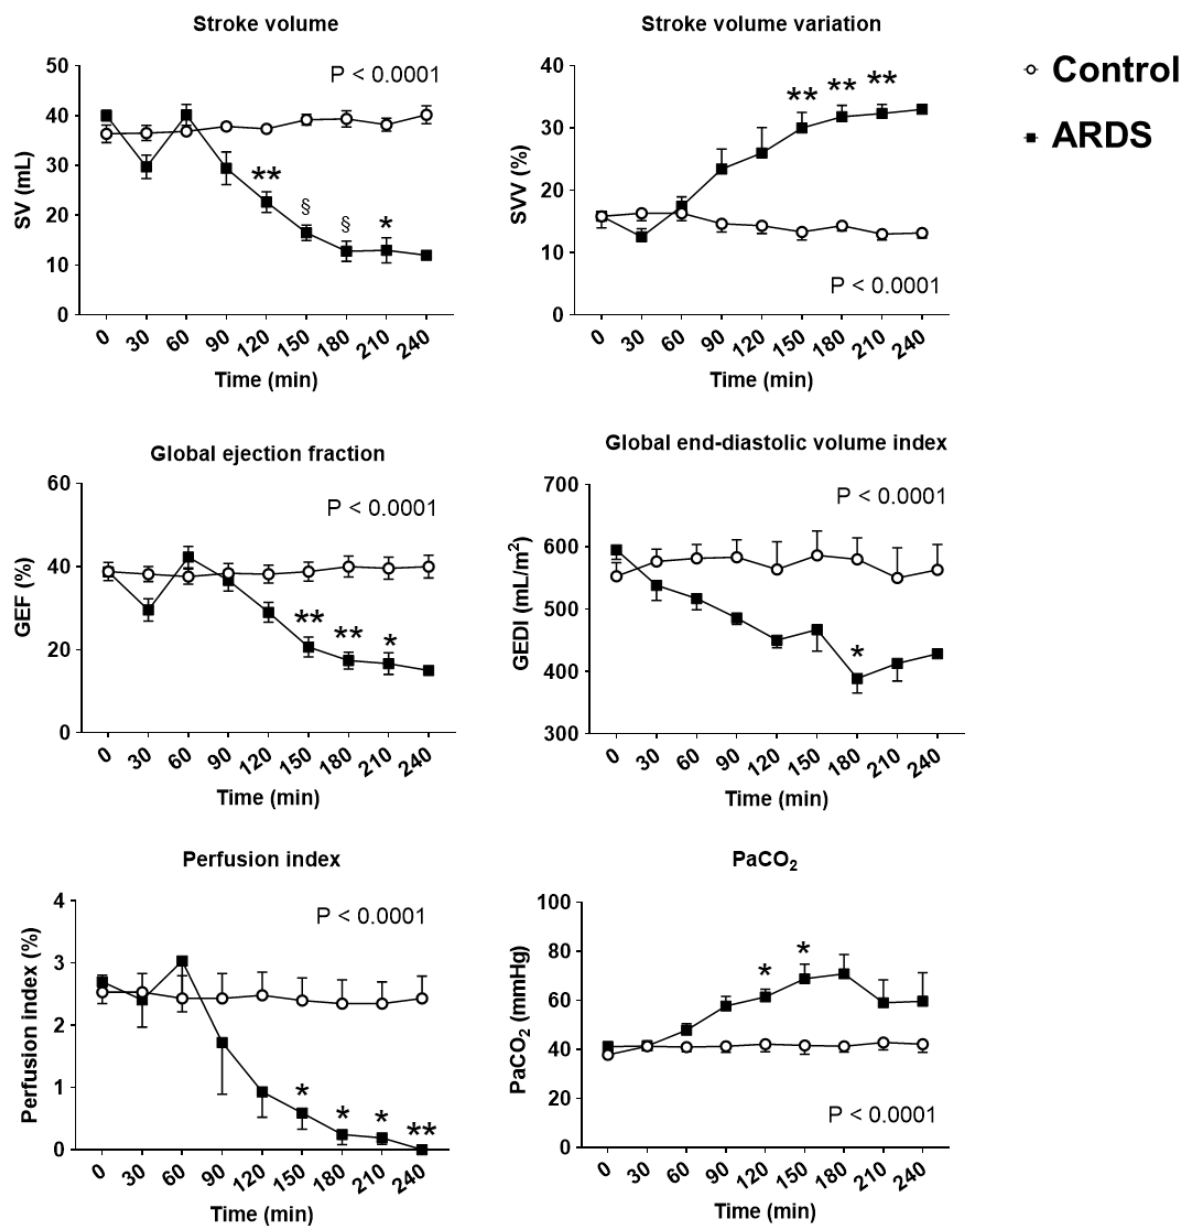

**Supplementary Figure 1.** Changes in hemodynamic parameters (mixed-effect model,  $P < 0.0001$  for all).  $n=6$  for the control group,  $n=7$  for ARDS group. \*  $P < 0.05$ , \*\*  $P < 0.01$ , †  $P < 0.001$ , and §  $P < 0.0001$  between each group. SV, stroke volume; GEF, global ejection fraction; GEDI, global end-diastolic volume index; and SVV, stroke volume variation.

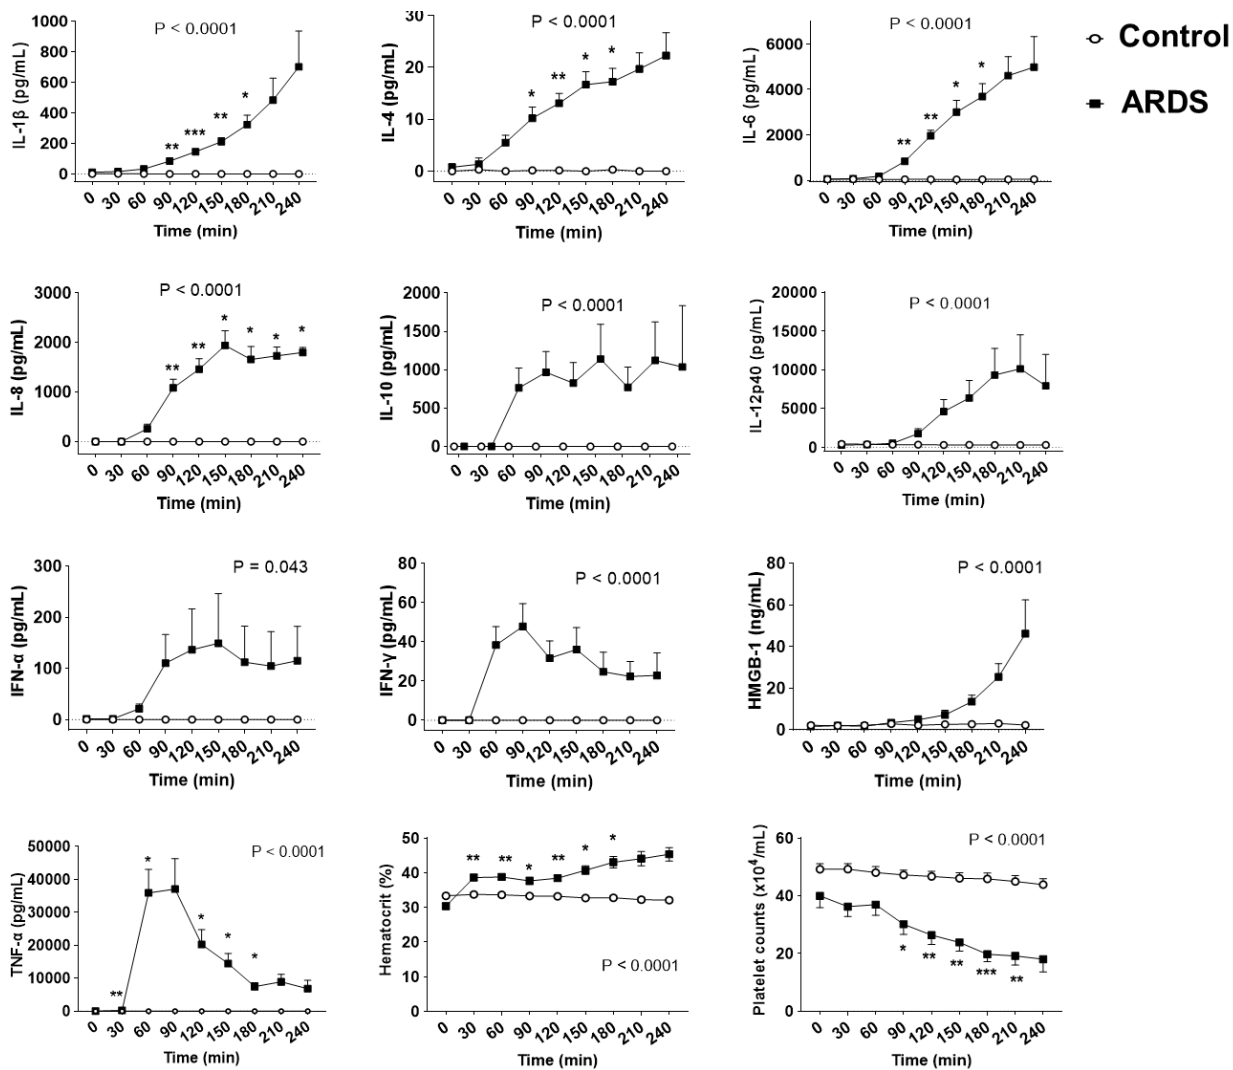

**Supplementary Figure 2.** Changes in inflammatory markers, hematocrit, and platelet counts during the experiment (mixed-effect model,  $P < 0.0001$  for all).  $n=6$  for the control group,  $n=7$  for ARDS group. \*  $P < 0.05$ , \*\*  $P < 0.01$ , †  $P < 0.001$ , and §  $P < 0.0001$  between each group.

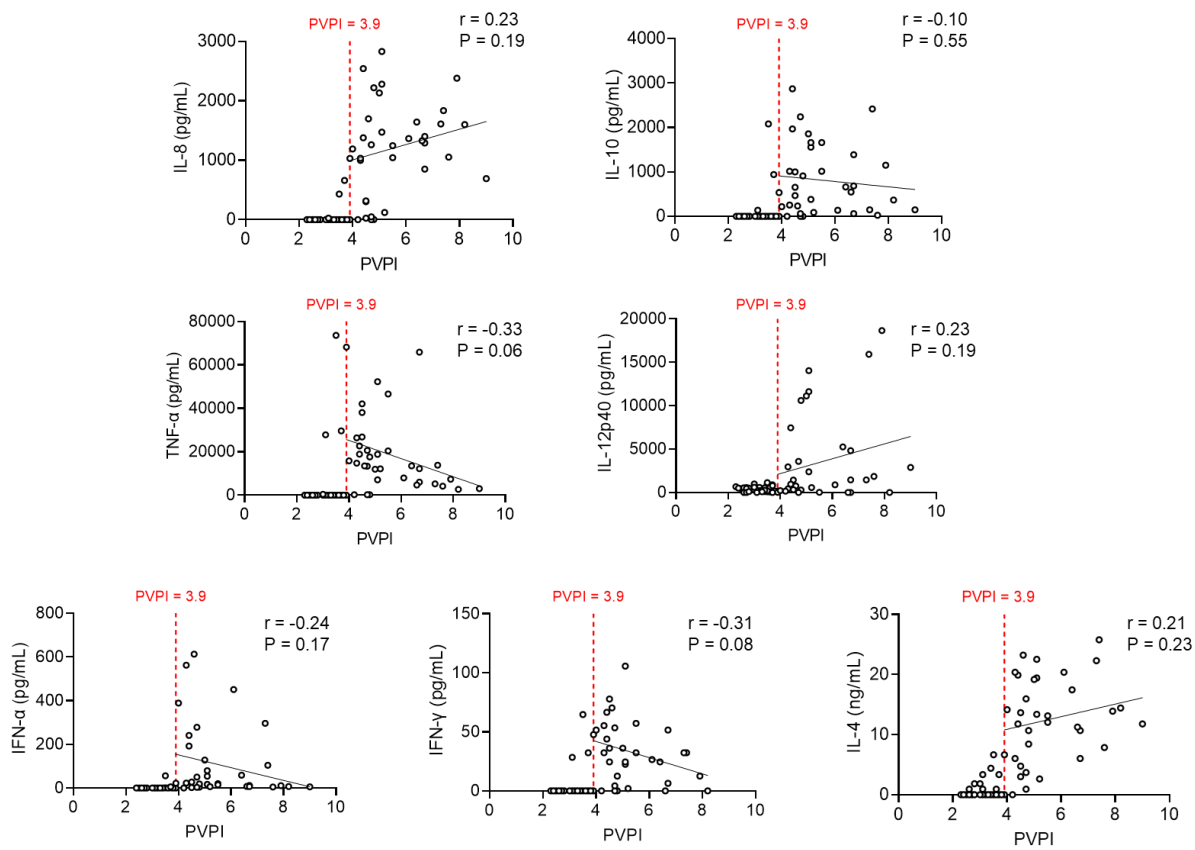

**Supplementary Figure 3.** Correlations between the pulmonary vascular permeability index (PVPI) and experimental parameters in a subgroup of animals with PVPI >3.9.

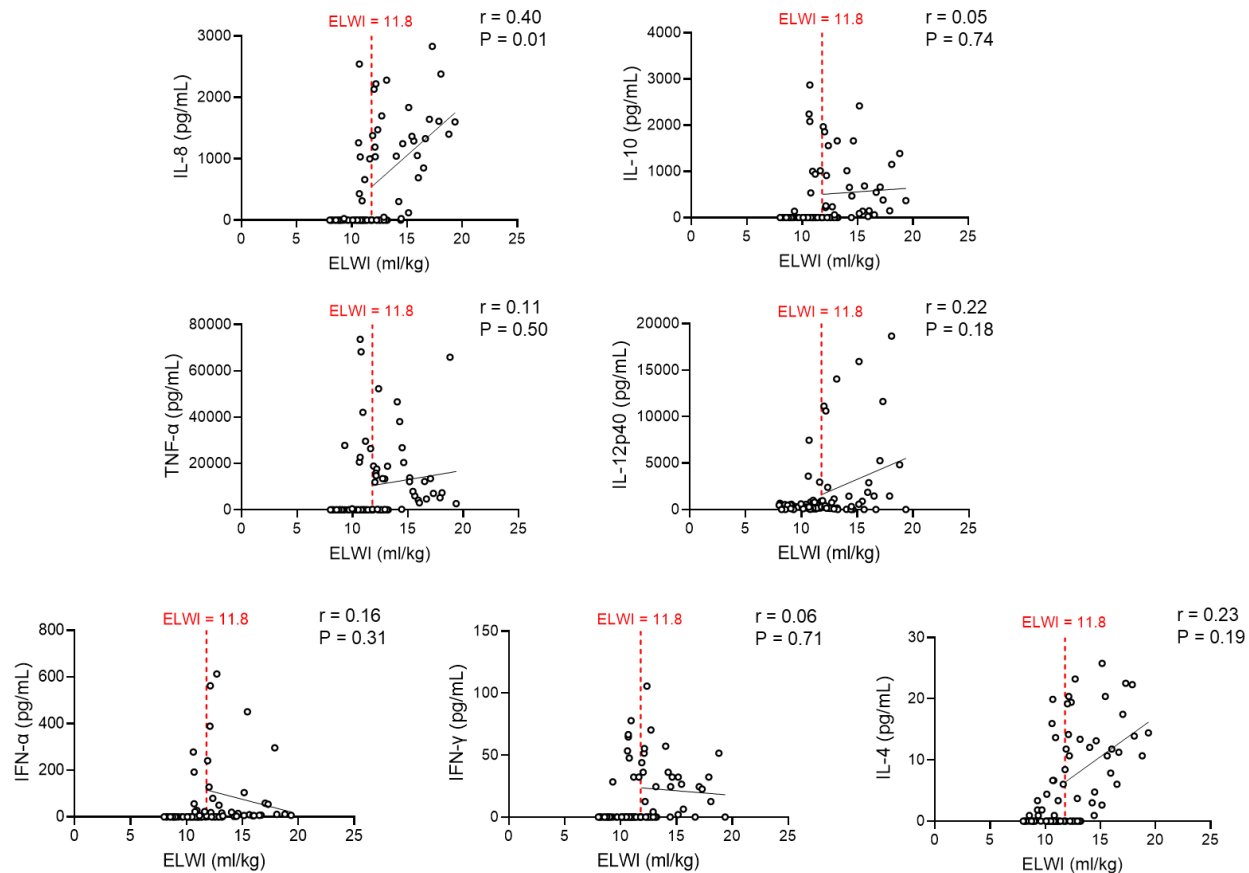

**Supplementary Figure 4.** Correlations between extravascular lung water index (ELWI) and experimental parameters in a subgroup of animals with ELWI > 11.8.
